# Supplementary material for: Dissecting the single-cell transcriptome network in patients with esophageal squamous cell carcinoma receiving operative paclitaxel plus platinum chemotherapy
Source: PubMed Central journal article supplement (PMC8546051; doi:10.1038/s41389-021-00359-2), 2021-10-26

**A**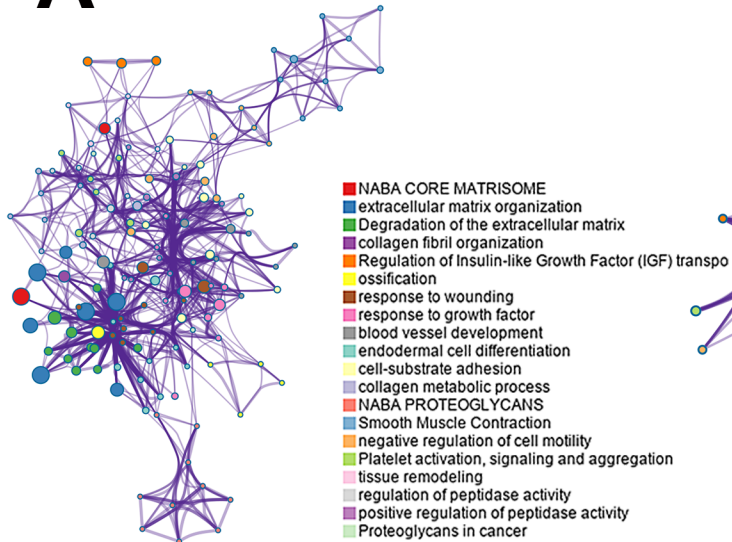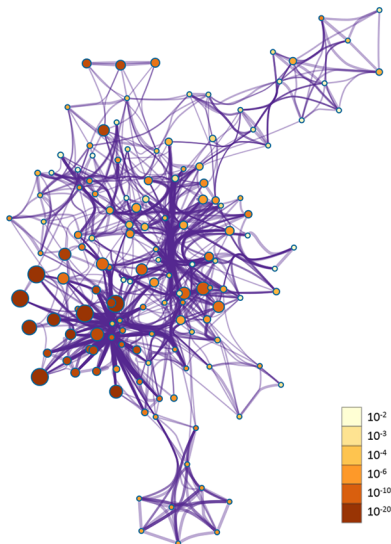**B**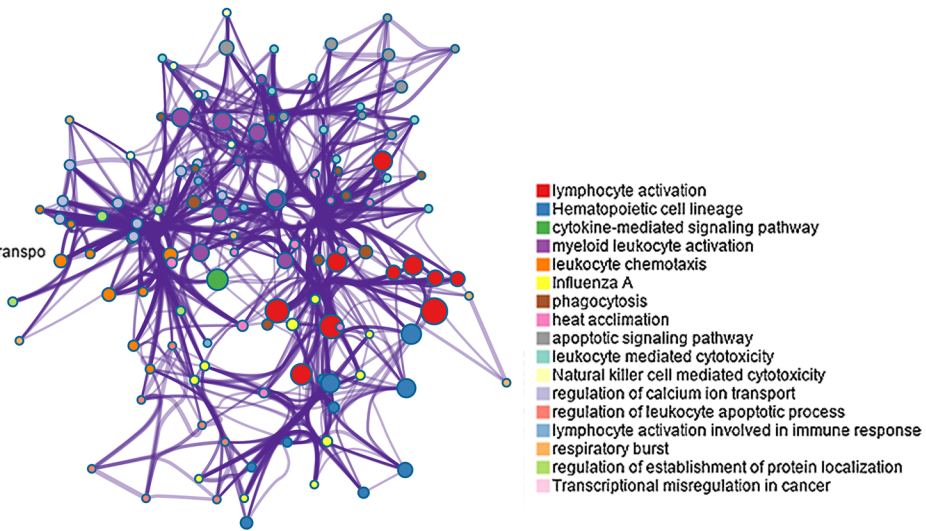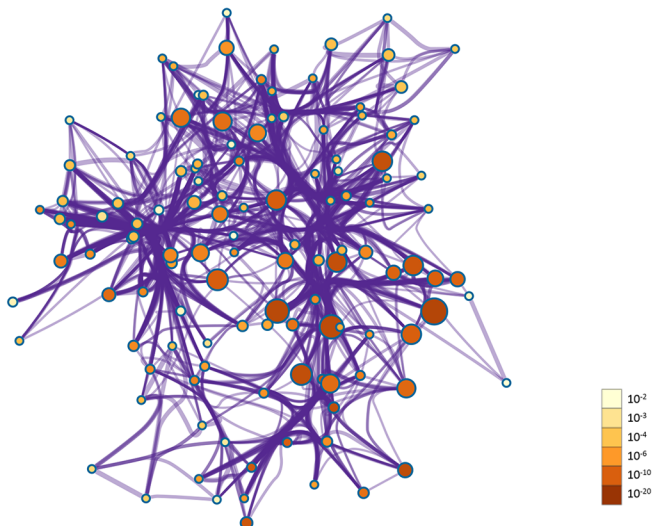

Supplement: 41389_2021_359_MOESM6_ESM.pdf [file 41389_2021_359_MOESM6_ESM.pdf]
